# Supplementary material for: The Plant Ontology Database: a community resource for plant structure and developmental stages controlled vocabulary and annotations
Source: PubMed Central journal article supplement — Nucleic Acids Res. 2008 Jan;36(Database issue):D449–54. doi: 10.1093/nar/gkm908 (PMC2238838; doi:10.1093/nar/gkm908), 2008-01
Supplement: nar_gkm908_1.pdf [file nar_gkm908_1.pdf]

## Figure S1

Illustration of using PO browser. (a) The term 'endosperm' is searched for term name or synonyms using a free text match rather than an exact match. A list of terms appears and the search string is highlighted. Search can be restricted by the aspect of the ontology, e.g. plant structure or plant growth stage. (b) Term Details page shows name, ID/Accession, definition, comments, its lineage, external references and number of annotation associated to the term. (c) A table of annotations associated to the term "Endosperm" and its children are displayed. The table includes information on the object such as gene, QTL or stock, species it belongs, reference, evidence code and the link to Gene Ontology (GO) if annotations exists in GO database for the same object. (d) Annotation Details page shows information and all the annotations to the object, e.g. *ae1* gene from *Oryza sativa*. (e) For genes and gene products that are annotated to GO, an external link takes the users to the GO database. The black arrow points to the sequential views a user will see while navigating from search to the annotation details.

Figure S1

**(a) Term Search Results**

15 results for **endosperm** in field(s) **term name, synonyms**

Filter search results [?](#)

Ontology  Remove all filters

All Plant Growth Stage Plant Structure

**Term**

basal **endosperm** transfer cell ; **PO:0009018** [\[show def\]](#) [\[view annotations\]](#)

basal **endosperm** transfer layer ; **PO:0009019** [\[show def\]](#) [\[view annotations\]](#)

cellular **endosperm** ; **PO:0000199** [\[show def\]](#) [\[view annotations\]](#)

central **endosperm** ; **PO:0006220** [\[show def\]](#) [\[view annotations\]](#)

chalazal cyst ; **PO:0000201** [\[show def\]](#) [\[view annotations\]](#)  
Query matches synonym: chalazal **endosperm** cyst

**endosperm** ; **PO:0009089** [\[show def\]](#) [\[view annotations\]](#)

**endosperm** development stage ; **PO:0007633** [\[show def\]](#) [\[view annotations\]](#)

**endosperm** parenchyma ; **PO:0005415** [\[show def\]](#) [\[view annotations\]](#)

**endosperm (c)**

Term annotations Term information Term lineage External references

Filter annotations displayed [?](#)

Filter annotations: Species Data source Evidence Code View annotations

All Curator Approved All Gramene Genes All Gramene QTL All MaizeCDB All IC All IDA All IEP

Annotations to **endosperm ; PO:0009089** and its children

Get this data as **RDF/XML**.

**endosperm ; PO:0009089** [\[show def\]](#)

| Qualifier | Name / Symbol                           | Information                           | Evidence | Reference     | Assigned by | Associated to |
|-----------|-----------------------------------------|---------------------------------------|----------|---------------|-------------|---------------|
|           | <b>ABI4</b><br>ABA INSENSITIVE 4        | gene from <i>Arabidopsis thaliana</i> | IDA      | PMID:16844907 | TAIR        | GO            |
|           | <b>ACT11</b><br>ACTIN-11                | gene from <i>Arabidopsis thaliana</i> | IDA      | PMID:9037165  | TAIR        | GO            |
|           | <b>ADC2</b><br>ARGININE DECARBOXYLASE 2 | gene from <i>Arabidopsis thaliana</i> | IDA      | PMID:15733873 | TAIR        | GO            |
|           | <b>ae1</b><br>amylose extender-1        |                                       |          |               |             |               |
|           | <b>ae1</b><br>amylose extender1         |                                       |          |               |             |               |
|           | <b>ae2</b><br>amylose extender-2        |                                       |          |               |             |               |

**(b) Term Information**

Term information Term lineage External references Term annotations

**Accession** PO:0009089

**Ontology** plant structure

**Synonyms** None

**Definition** Nutritive tissue in a seed, in angiosperms usually triploid and formed after fertilization by the fusion of the polar nucleus, sometimes diploid or polyploid. [source: APWeb:Glossary, GR:0000000000]

**Comment** None

**Term Lineage**

Filter tree view [?](#)

Filter Annotation Objects Counts: Term View Options  Term ancestors  Term parents, siblings and children

Data source: All Gramene Genes Gramene QTL MaizeCDB

all: all [15859]

- PO:0009011: plant structure [15768]
- PO:0009003: sporophyte [13227]
- PO:0006342: infructescence [4109]
  - PO:0009001: fruit [4108]
    - PO:0009010: seed [2927]
      - PO:0009089: endosperm [714]**
- PO:0009010: seed [2927]
  - PO:0009089: endosperm [714]**
- PO:0009007: tissue [1580]
  - PO:0009089: endosperm [714]**

**(d) Information**

**Name(s)** amylose extender-1

**Type** gene

**Species** *Oryza sativa*

**Synonyms** High amylose mutant

**Database** Gramene Genes, [GR\\_gene:GR:0060016](#)

**Associated** No associations to GO

**Sequence** No peptide sequence available

**Term Annotations**

Filter annotations displayed [?](#)

Filter Annotations: Evidence Code All Curator Approved All IC All IDA All IEP

| Qualifier | Term                                                             | Ontology                           | Evidence | Reference   | Assigned by                 |
|-----------|------------------------------------------------------------------|------------------------------------|----------|-------------|-----------------------------|
|           | FR.04 fruit ripening complete <a href="#">[view annotations]</a> | plant growth and development stage | IMP      | GR ref:5683 | Gramene (via Gramene Genes) |
|           | <b>endosperm</b> <a href="#">[view annotations]</a>              | plant structure                    | IMP      | GR ref:5683 | Gramene (via Gramene Genes) |

**(e) the Gene Ontology AmiGO**

Advanced Search BLAST search Browse Help

Search GO   Terms  Genes or proteins  Exact Match

**ACT11**

**Information**

**Name(s)** ACTIN-11

**Type** gene

**Species** *Arabidopsis thaliana*

**Synonyms** ACTIN-11 AT3G12110

**Database** TAIR, TAIR:gene:1944673

**Sequence** [View sequence](#) [use as BLAST query sequence](#)

**Term Associations**

Filter associations displayed [?](#)

Filter Associations: Evidence Code All Curator Approved All IC All IDA All IEP

| Qualifier | Term                                                                              | Ontology           | Evidence | Reference                  | Assigned by |
|-----------|-----------------------------------------------------------------------------------|--------------------|----------|----------------------------|-------------|
|           | cytoskeleton <a href="#">[view annotations]</a>                                   | cellular component | ISS      | PMID:9037165               | TAIR        |
|           | structural constituent of cytoskeleton <a href="#">[view annotations]</a>         | molecular function | ISS      | PMID:9037165               | TAIR        |
|           | actin cytoskeleton organization and biogenesis <a href="#">[view annotations]</a> | biological process | TAS      | TAIR:Publication:501683766 | TAIR        |
